# Supplementary material for: Few-layer black phosphorus and boron-doped graphene based heteroelectrocatalyst for enhanced hydrogen evolution
Source: Royal Society of Chemistry journal article supplement (doi:10.1039/d0ta07659g), 2020-01-01
Supplement: d0ta07659g1.pdf [file d0ta07659g1.pdf]

## Supporting Information for

### **Few-layer black phosphorus and boron-doped graphene based heteroelectrocatalyst for enhanced hydrogen evolution**

Selengesuren Suragtkhuu,<sup>a</sup> Munkhjargal Bat-Erdene,<sup>b</sup> Abdulaziz S. R. Bati,<sup>b</sup> Joseph G. Shapter,<sup>b</sup> Sarangerel Davaasambuu<sup>\*a</sup> and Munkhbayar Batmunkh<sup>\*b,c</sup>

<sup>a</sup> Department of Chemistry, School of Arts and Sciences, National University of Mongolia,  
Ulaanbaatar 14200, Mongolia

<sup>b</sup> Australian Institute for Bioengineering and Nanotechnology, The University of Queensland,  
Brisbane, Queensland 4072, Australia

<sup>c</sup> Centre for Clean Environment and Energy, Griffith University, Gold Coast, Queensland  
4222, Australia

\*Corresponding author. E-mail: [sarangerel@num.edu.mn](mailto:sarangerel@num.edu.mn); [m.batmunkh@uq.edu.au](mailto:m.batmunkh@uq.edu.au);  
[m.batmunkh@griffith.edu.au](mailto:m.batmunkh@griffith.edu.au)

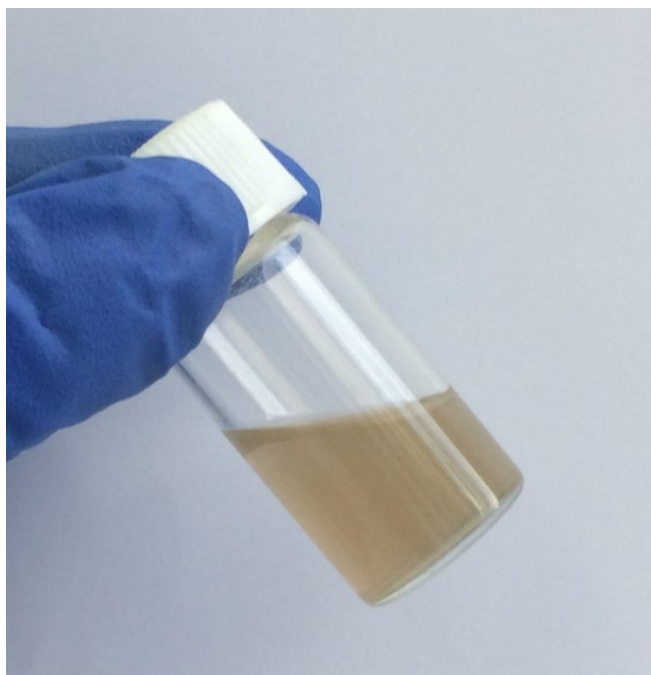

**Fig. S1** Photograph of FL-BP solution in a mixed ethanol/water solvent (4:1 v/v) prepared using a liquid-phase exfoliation of bulk BP.

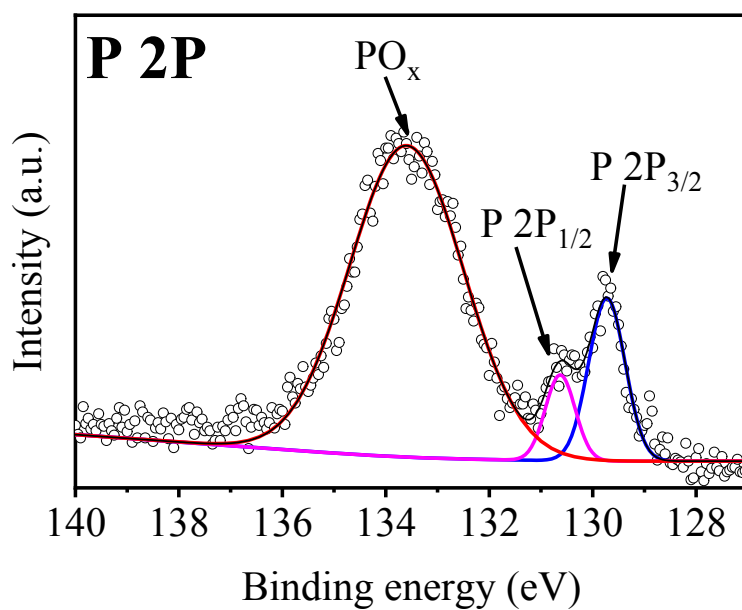

**Fig. S2** High-resolution X-ray photoelectron spectroscopy P 2p spectrum of oxidized few-layer black phosphorus (FL-BP).

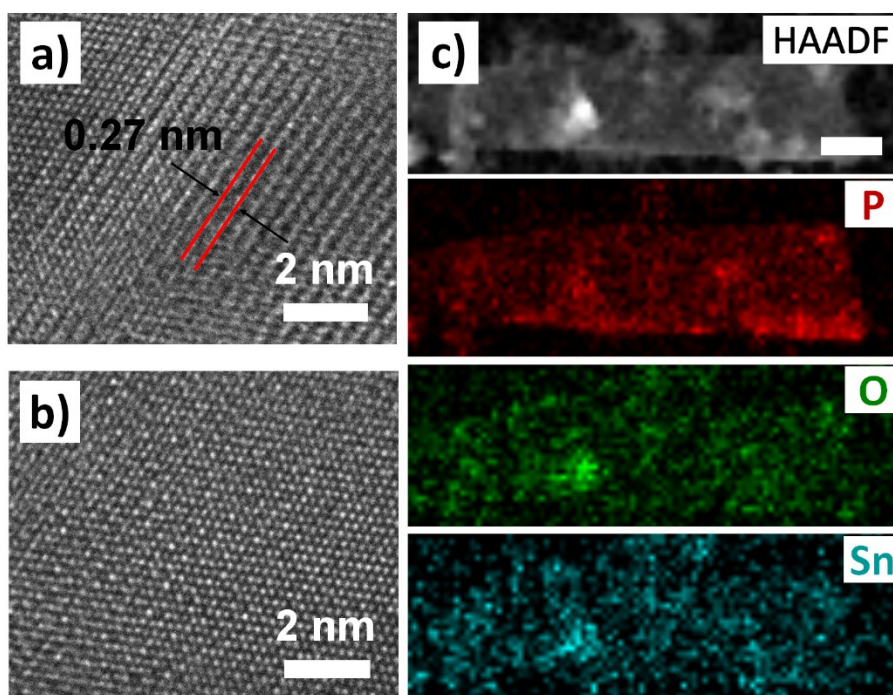

**Fig. S3** (a and b) High-resolution transmission electron microscopy (HRTEM) images of FL-BP nanosheet. (c) High-angle annular dark-field-scanning transmission electron microscope (HAADF-STEM) image (scale bar: 100 nm) of FL-BP, and the corresponding elemental mapping images for P, O, and Sn elements.

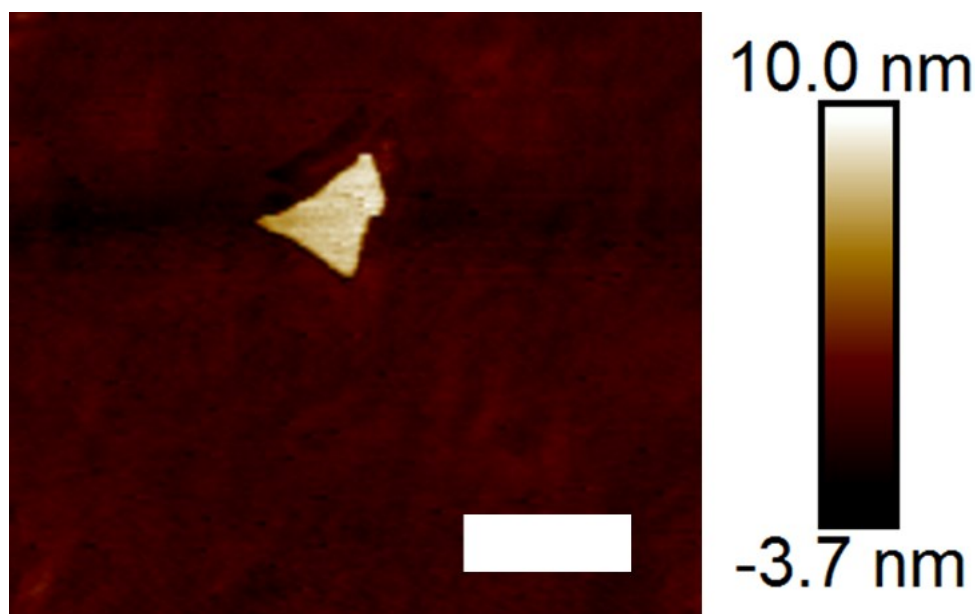

**Fig. S4** Atomic force microscopy (AFM) image of FL-BP nanosheets. Scale bar: 500 nm. Thickness: 7.5 nm.

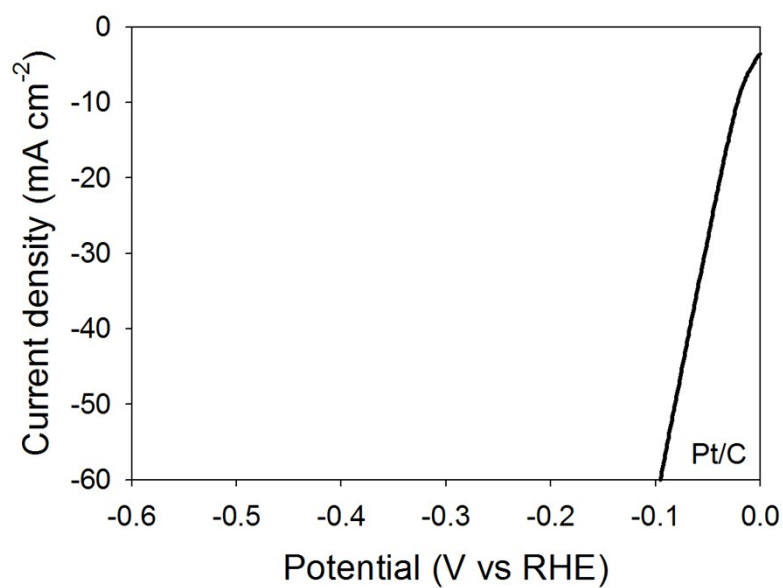

**Fig. S5** Linear sweep voltammetry (LSV) curve of Pt/C electrocatalyst in 0.5 H<sub>2</sub>SO<sub>4</sub>.

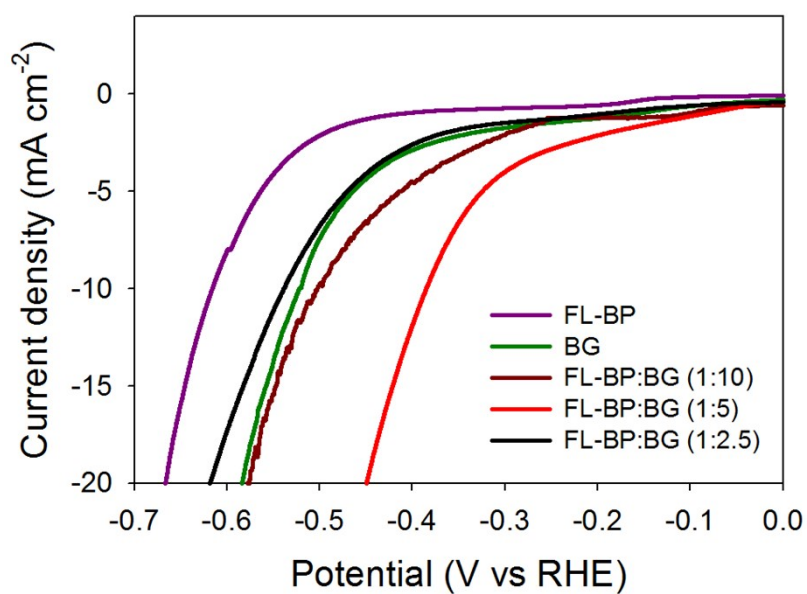

**Fig. S6** LSV curves of FL-BP, BG and their hybrid electrocatalysts with different contents.
